# Supplementary material for: Epigenetic regulation of Atrophin1 by lysine-specific demethylase 1 is required for cortical progenitor maintenance
Source: PubMed Central journal article supplement (PMC4284801; doi:10.1038/ncomms6815), 2014-12-18
Supplement: ncomms6815-s1.pdf [file ncomms6815-s1.pdf]

Supplementary Figure 1.

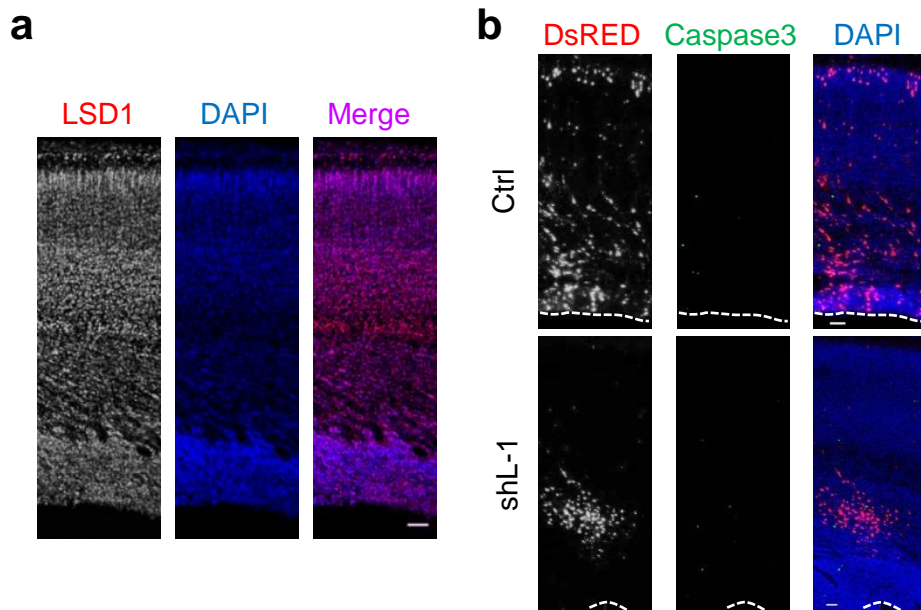

**Supplementary Fig. 1** related to Fig. 1. **LSD1 is expressed during brain development and LSD1 knockdown does not induce obvious apoptosis.** (a) Immunostaining of coronal rat cortical sections at E20.5 with LSD1 antibody. Nuclei were labeled with DAPI. Scale bars, 50 $\mu$ m. (b) Brain slices (E20.5) electroporated with control or shL-1 at E16.5 were immunostained with activated-caspase3 antibody to label cells undergoing apoptosis. Scale bar = 50  $\mu$ m.

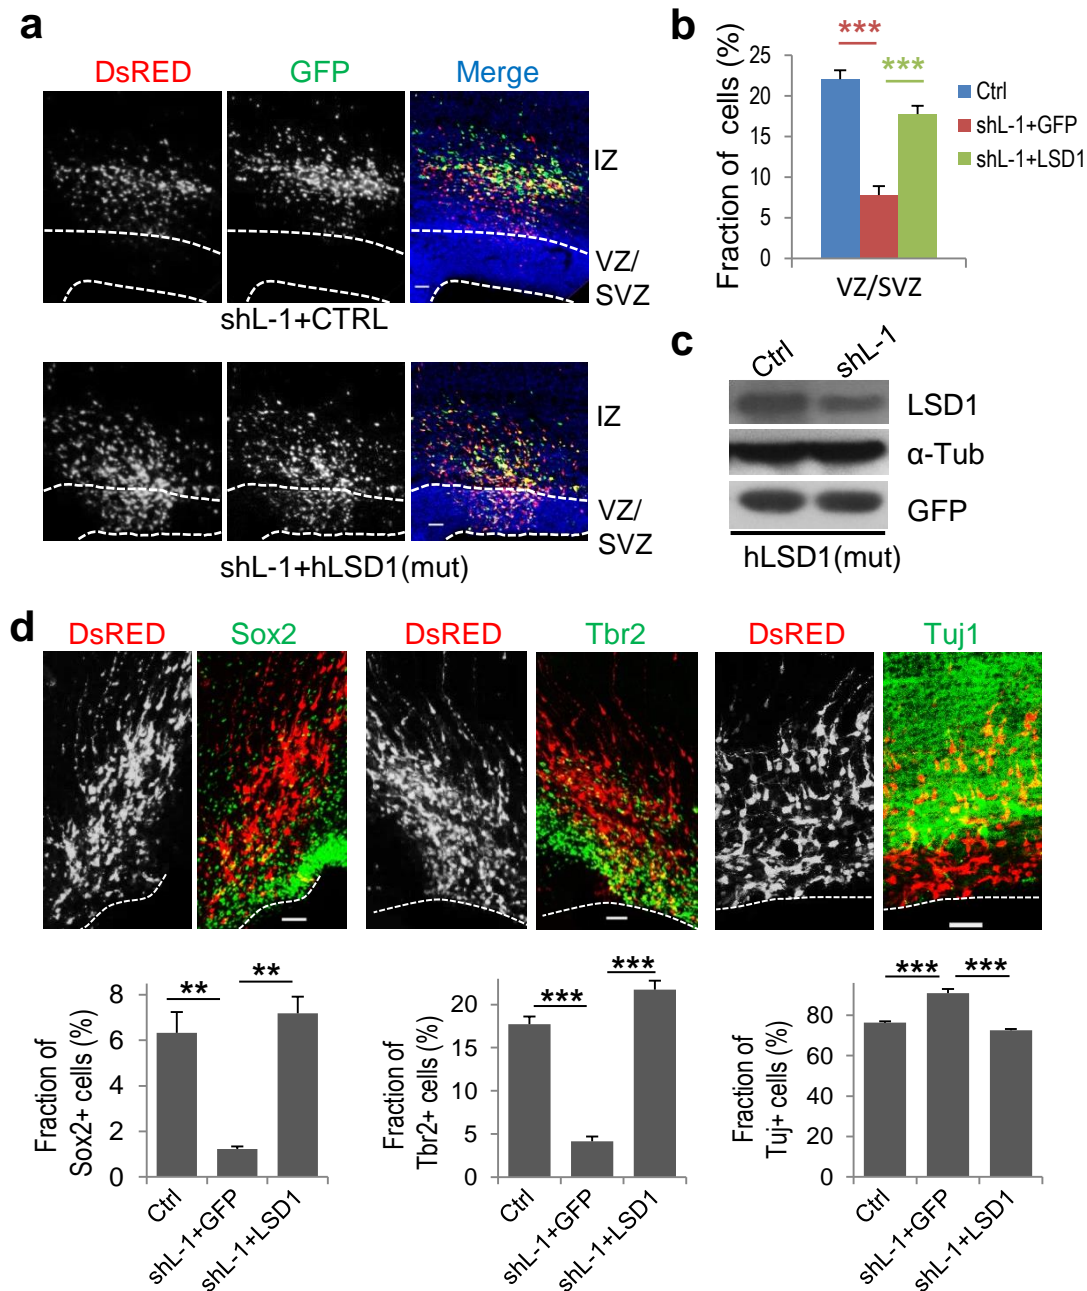

**Supplementary Fig. 2 related to Fig. 1&2. LSD1 knockdown induced NPC depletion can be rescued by synonymously mutated human LSD1.**

**(a)** Coronal sections of rat brains electroporated with LSD1 shRNA (shL-1) together with pCAGIG-GFP or pCAGIG-hLSD1(mut) at E16.5 and inspected at E20.5. Scale bars, 50 $\mu$ m. **(b)** Quantification of cell distribution in (a). Data are means $\pm$ SEM. \*\*\*:  $P < 0.001$ . One-way ANOVA. shCtrl: n=26/8; shL-1+GFP: n=8/3; shL-1+hLSD1: n=10/3. n: number of brain slices from different brains. **(c)** PCAGIG-hLSD1(mut) (synonymously mutated human LSD1) were cotransfected with control shRNA (shCtrl) or shL-1 into HEK293 cells and analyzed as in Fig. 1b,c. **(d)** Rescue experiments were done as in (a) and analyzed as in (Fig.2a). Data are means $\pm$ SEM. \*\* $P < 0.01$ ; \*\*\* $P < 0.001$ . Ctrl (Sox2: n=7/5; Tbr2: n=5/5; Tuj1: n=7/5); shL-1+pCAGIG (Sox2: n=3/3; Tbr2: n=3/3; Tuj1: n=3/3); shL-1+pCAGIG-mut-hLSD1 (Sox2: n=4/3; Tbr2: n=4/3; Tuj1: n=4/3). one-way ANOVA. n: number of brain slices from different brains. Scale bars, 50  $\mu$ m..

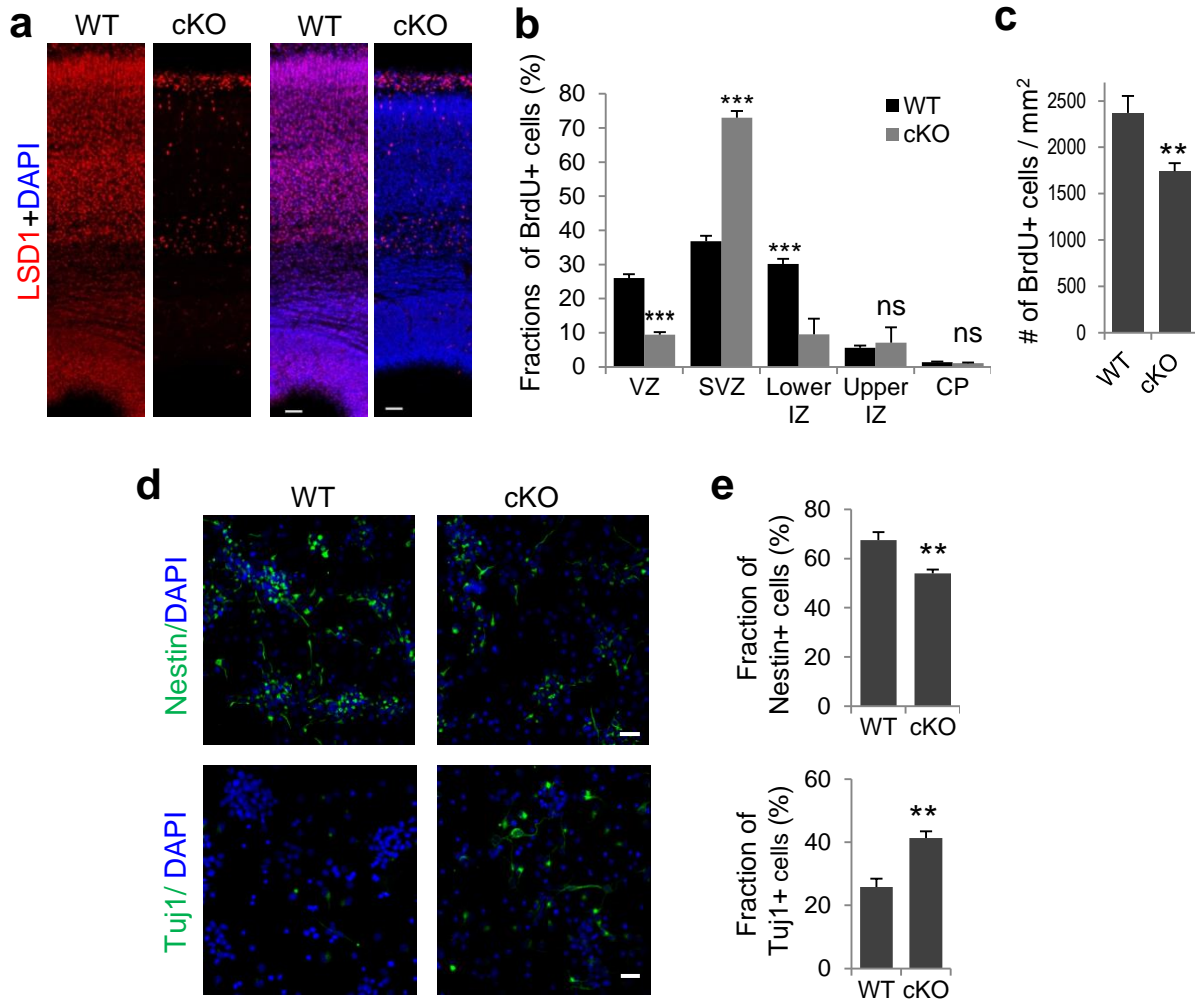

**Supplementary Fig. 3** related to Fig. 2. **Knockout of LSD1 leads to enhanced differentiation of NPC.**

(a) Brain-specific *LSD1* cKO leads to thinner cortex. Immunostaining of coronal cortical sections from P0 wide-type or *LSD1* cKO mice with LSD1 antibody. Nuclei were labeled with DAPI. Scale bar = 50  $\mu$ m. (b, c) Wide-type or *LSD1* cKO mice were treated and analyzed as in Fig. 2c,d. (b) Quantification of BrdU+ cell distribution across the coronal cortex. (c) Quantification of the number of BrdU+ cells in the cortex (per mm<sup>2</sup>). Data represent means  $\pm$  SEM. \*\*\*P < 0.001, \*\*P < 0.01, ns, not significant. (WT: n=9/3; cKO: n=9/3; Student's t-test). n, number of slices from different brains. (d,e) NPC from E14.5 mouse cortices were cultured for 48 h, stained for Nestin and Tuj1 and quantified. Data represent means  $\pm$  SEM. \*\*P (Nestin)=0.008; \*\*P (Tuj1)=0.004 (t-test, >1500 cells were counted for each group from four experiments). Nuclei were labeled with DAPI. Scale bar = 50  $\mu$ m.

Supplementary Figure 4.

>chr4:161114749-161117223

CGGAGGCAGAGGTAGATGGAGAATCTCTGAGTTCGAGACCTGCGTGGTCTACAGAACGAGTTCCAAGATAGCCAGGGCTTTGG  
GCTTAAGAGCCAGAACTTTTTTGTGTTGTTTGTTCCTCAAGACAGGGTTTCTCTGTGTAGCCTGACTGTACCGGAACGCCTCACC  
CTACAGACCCGAGGCTGGCTTGAAGTCTCAGAGATCTGCCTGCTTCTGCCTCCTAAATGTCGGGATGAAAGGCGCATGACAGCACT  
GCCTGGTTTCAAGAGTCAGAACATTTTAGGCCGGGCTTAAGTATAGTCCCAGAGCTGTGAGTGGAATGTTTGCTGTGACTGCC  
GCCCTGCGGCGAGAAAGAAATCGACCCAGGAGCCATCATGCGCCCCACCCCAAGTCCATTCCATCGCCCTTCCCTGTAGGACC  
CACCTTCCCGTGCAGCTGAAGCCATAGGCTTTAATAACCTCCTGCTGGATCTGTGTGGCTACAGGCAGCACGAATTGCAGCA  
TCTTGCCCATATCGTTGCACGCATTGTCTCTAGCCTCGTCCATACGCACGGCGTTCTCTGGGGCCGAGAACGCTTGATCACCT  
CCGCCAAGACCACTGCGAGACCGAAGCATCCCAGAGAGGTCCGCGGAGGACGGCGGGCGAGCCCAGAGAAGGGGAGAGCCA  
GGGAATTAGTGAGCCGAGGCTGCTTATCTGGAGGATAAGCTCGTCTCCCAACCTTCGCCCTAATGGGAAGGGCCCCACT  
TGGAGAAGGAACGAATAGTACTGCGCCCTCCCCCAGAAGACGGCCACGCCAGACTAGGCTCCTCACCTTGGCTGCTCT  
GCGCTCAGAGCCGAGGCTGAGCCGAGGCGGACGCCATAGGACGCCACTCGGTGCTTGAATAGTGTGAACACTGAGATCCGG  
AGGAGCCTGCAGCCAGCCGCTCCCCACGGCTGCGGACCTGTGGAGGCAGAAAGGAAGCTGTATTGCAGGAGGCGGAAGTT  
CCCGAGCGTGAATCTAGCACACGCGTACTTCTAGGAACTAGAGTGGGCCGAAAGCCCCAGCCCCATAGCTCGGCGAGGAC  
AGTAACTACTTGCTGATATTAGAAAACAGTCAGGTTGGGAGGGGTTTTCCGACCGAAGTCAGAAAACCTACTAGACAAATTCTAA  
AAGAGCTGTAACACTTGGCGGAAGCTATGCAGTAGCGAGCCAGGAAGGACGTCAACTCCACTTTTGGTGAGGGTGAGATCAG  
GGTGCCATTTCCACATCCCTCCACCAATATGAATCATAAAGCATACTTTCTTATTAGTTCGGTAAATAATATTCTAAAAGTCTA  
CTAAAACCAAGTCATTTCTTGAGTTTGTGACCACTTAATAGGACTATGCAAATGACTCAATGCTGATTGGCTGAAAACAGCCAATCA  
CAGCCCCCTCGTTGTTAAGAGGGAAAAAAGAGCTTCTCAAGAATAAGAGCTAGGAGAGCAAAAGCCGCCGTGAAGTATCTTA  
CGGTAGTGGTAGGCGAAATGGCTCGATGGCTTGATTCTTTTTTTTTTTTTTCTTTTTCTTTTTTTCGTTTTTCCGGAGCTGGG  
GACCGAACCCAAGGCCTTGCCTTGTAGGCAAGCGCTCTACCACTGAGCTAAATCCCCAACCCCGATGGCTTGATTCTTGTGTC  
TTTACAAGTTTTTGTACCCATCCTCTCCTCTCACACTACAAGGACTCTGGAACCTCAAGCCCTACCTGGCATGGTGCCACACTT  
CTGTGATACCAGCACAAAACTGAGAGGAAGTTCAAGGCTAGCTTGGACTCCATGGCCCTGCTTTGCTCAACCTACTTGGCAATT  
CCTAACTTTCTAATTCAAGCTACAGGGGACCCAACACCTTCTGGCCTCTTTTGGGCCTTGCAATCCTAAGCAGAGACATGAAC  
CCACACACCTAATTAGAAATAAATCTTTTAAAAATAAATCTTATTGGCCTCCTGGTTACACAATTTAACTGTTTCAAATCATTATA  
AACTATTGCCACGGAAAGGGAGTCAGATCTCTGAAATTCTGTCTCTGGAGCACTCTGGTGGCAGGGATGTAAGTCCCAAGGTCTG  
AGTAGGTAGATTTGGTTATGCTTACTGTGAACCTATTCTTGTCTGAAAGGCCTCAAGGGCCTTAACTCCCCAATCCAAAGGTCT  
AGGATGGGCGCCCATGAGTAATTCTGAGATTCCAAGACCAAGAAGAGCCTTGTCAGGCTAAAGAGTGGCTCAGTGGTTAAGA  
GCAGACTGCTCTTCCAGAGGTCCTGAGTTCAATTCACAACACATGGTGGCTCACAGCCATGTGGAATGGGATCCGATGCC  
CTCTTCTGGTGTGCTTCATGCAAGTGTAATAAATGAATAAAAAATTTAAAAAAGAACCTTGCCAACCTCATCTGTTCCATAA  
GGAAACCCCATCCATCCCTCCACACTTGCCC

**Supplementary Fig. 4.** related to Fig. 3. **The sequence of rat LBAL site achieved by ChIP-seq.** The underlined letters are the parts used for the design of primers.

Supplementary Figure 5.

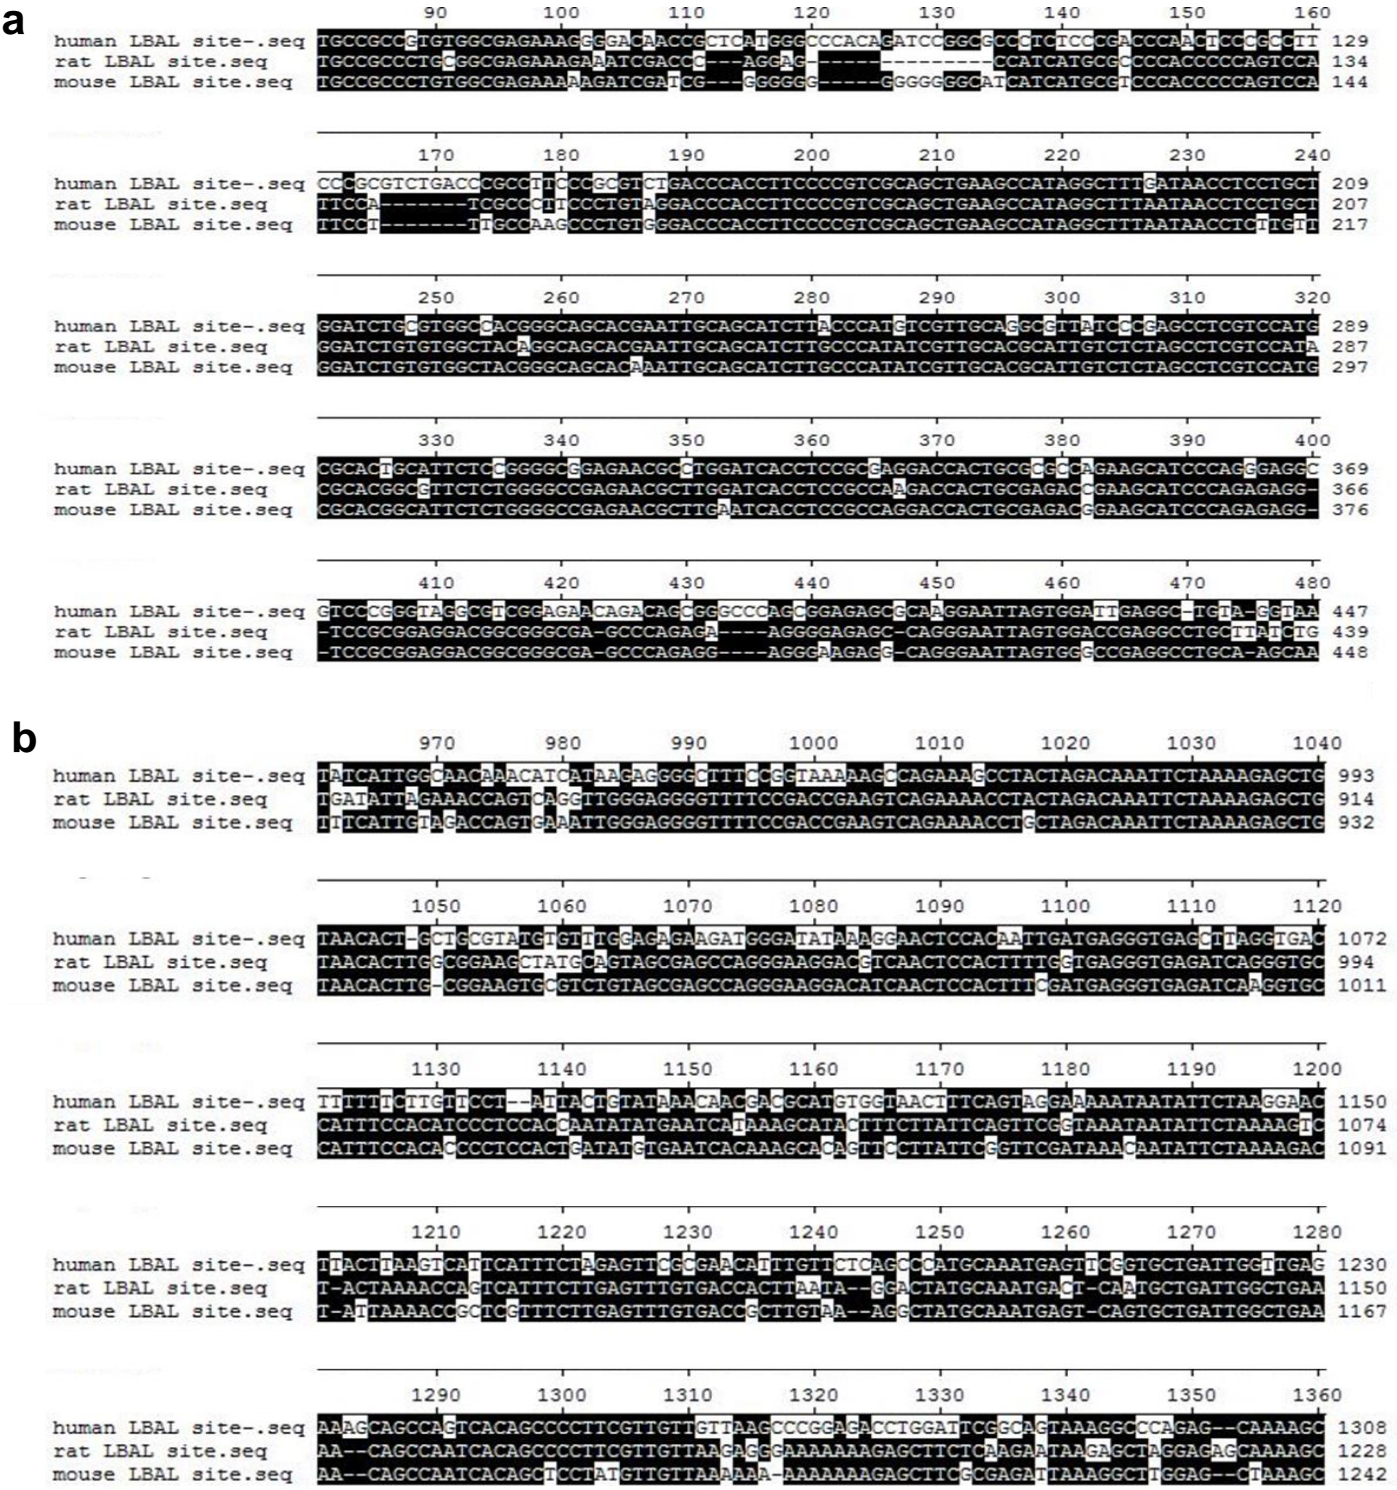

**Supplementary Fig. 5.** related to Fig. 3. LBAL, LSD1 binding site at the ATN1 locus, is conserved in rodents and humans. (a, b) Schematic illustration of sequence alignment of LBAL site from human, rat and mouse. Blast results showed that 85% nucleotides of one part of rat LBAL site are identical to those of mouse LBAL site (1108 out of 1306 nucleotides are the same). Two major parts of LBAL site (a and b) are homologues between human and rat. 244 out of 297 nucleotides in (a) and 227 out of 328 nucleotides in (b) are identical. The letters highlighted in black color showed that human, rat and mouse share the same nucleotides there.

Supplementary Figure 6.

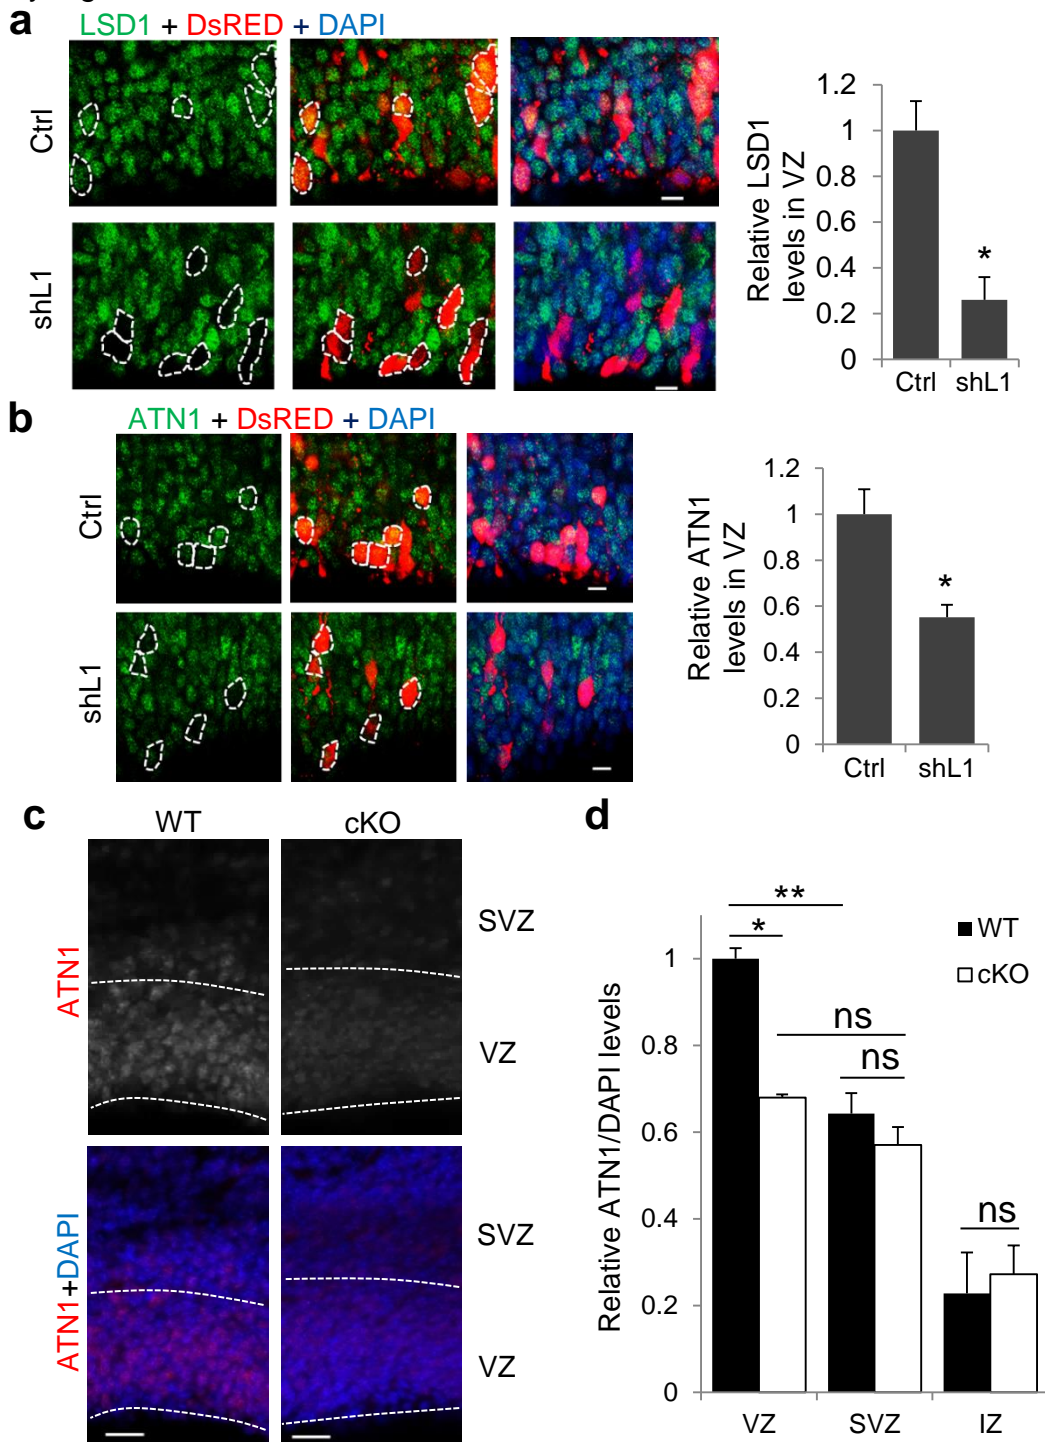

**Supplementary Fig. 6** related to Fig. 3. **Knockout or knockdown of LSD1 leads to down-regulation of ATN1 level.** (a,b) Immunostaining of coronal cortical sections from E19.5 rat brain electroporated with Ctrl or shL1 at E16.5 with LSD1 (a) or ATN1(b) antibody. For each cortex, the fluorescence intensity of 5~10 DsRED+ cells in VZ was quantified and the average was used to represent as the levels of LSD1 or ATN1 of this cortex. Then the levels of LSD1 or ATN1 in shRNA group were normalized to that of shControl group. Nuclei were labeled with DAPI. \*P=0.01 (LSD1), \*P=0.02 (ATN1). LSD1 (Ctrl: n=3/3; shL1: n=3/3); ATN1 (Ctrl: n=3/3; shL1:n=3/3); Student's t-test. n: number of brain slices from different brains. Scale bar: 5µm. (c,d) Immunostaining of coronal cortical sections from wild-type or brain-specific *LSD1*-cKO mice at P0 with ATN1 antibody. Nuclei were labeled with DAPI. Data are means ± SEM. \*P<0.05; \*\*P<0.01; ns, not significant. (WT: n=6/3; cKO: n=6/3; one-way ANOVA). Scale bar: 20µm.

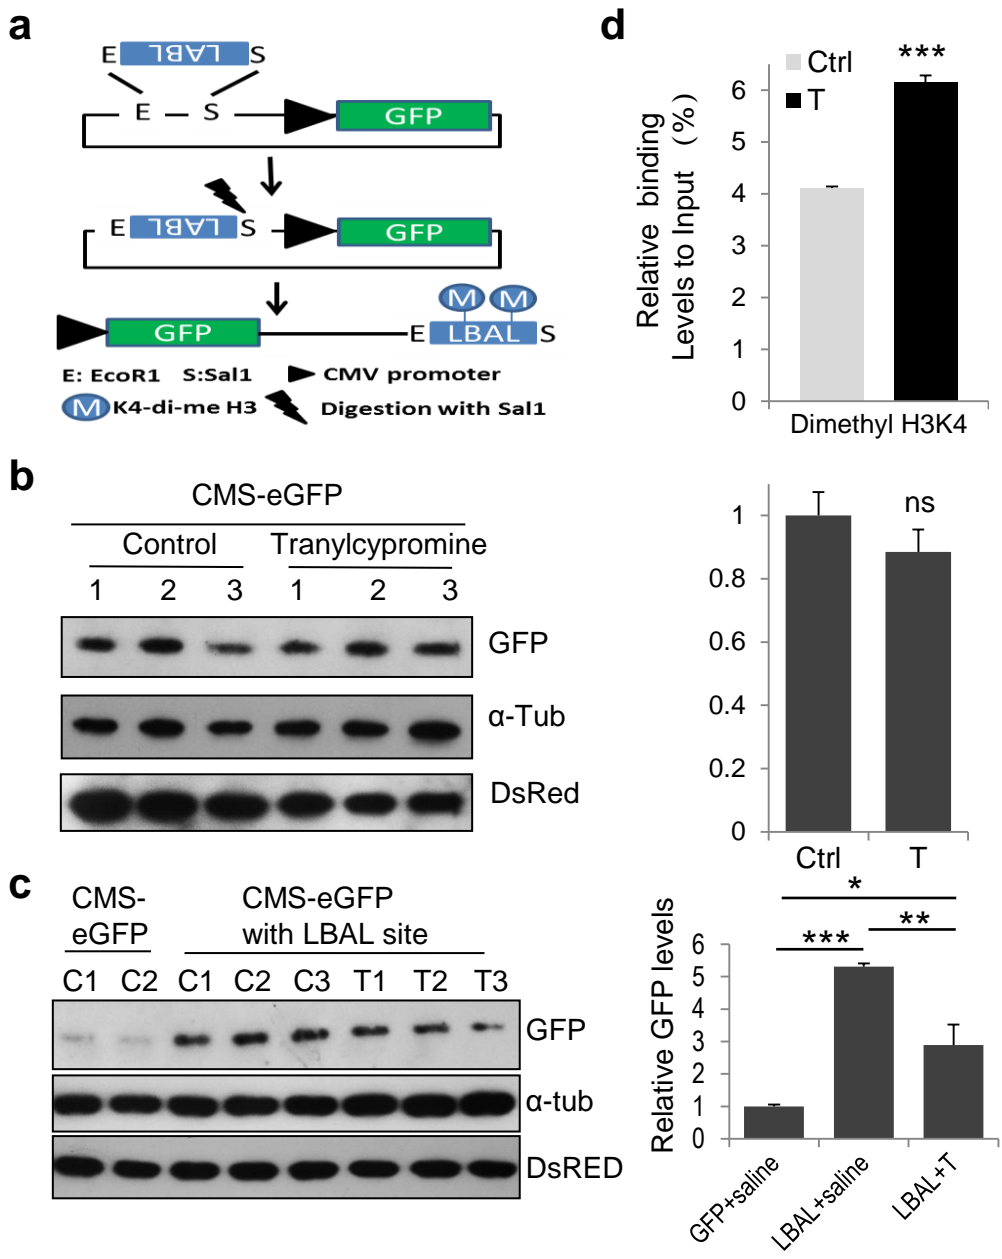

**Supplementary Fig. 7.** related to Fig. 3. **LBAL site plays an important role in gene expression.**

**(a)** Schematic illustration of pCMS-eGFP-LBAL reporter. LBAL site was inserted into pCMS-eGFP at EcoR1/Sal1 site. The construct was cut with Sal1 to generate pCMS-eGFP-LBAL. **(b,c)** Linearized pCMS-eGFP or pCMS-eGFP-LBAL were transfected into N2a cells together with RetroQ-DsRED. 4 h later, cells were separated into two equal parts. One part was treated with saline and the other part with Tranylcypromine (T, 10µM). 16 hrs later, cell lysates were collected and GFP levels were analyzed by western blotting, with α-Tub as the loading control and DsRed as transfection efficiency control. Right panel: Quantification of GFP expression levels with α-Tub as the loading control. Data was shown as means ± SEM. \*P<0.05, \*\*P<0.01, \*\*\*P<0.001; (n=3; T-test). **(d)** N2a cells were treated as in (c). Histone modification levels at LBAL site in the linearized plasmids were analyzed as in Fig. 3d. Data was shown as means ± SEM. \*\*\*P<0.001; ns, not significant. (n=3; t-test).

Supplementary Figure 8.

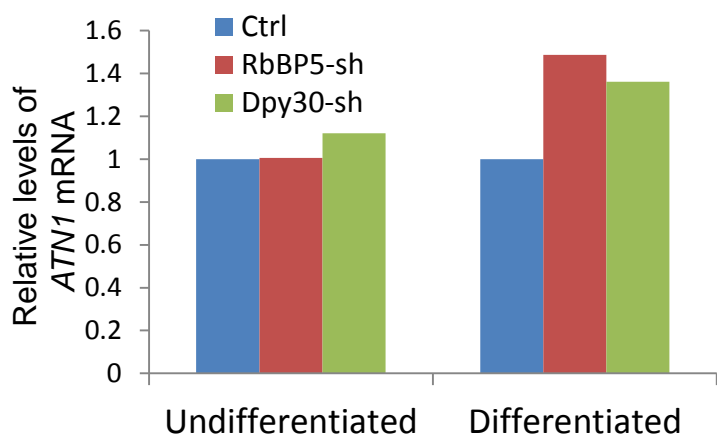

**Supplementary Fig. 8.** related to Fig. 3. **Depletion of RbBP5 or Dpy30 induces ATN1 expression.**

Depletion of RbBP5 or Dpy30 (subunits of histone methyltransferase SET1/MLL complexes) abort the ability to down-regulate ATN1 expression in embryonic stem cells (ESCs) undergoing differentiation (treatment with retinoic acid), while have little effect in undifferentiated ESCs. Quantification analysis of ATN1 levels from gene-chip results and deposited in the GEO database under GSE26136. (Jiang H, Shukla A, Wang X, Chen WY, Bernstein BE, Roeder RG (2011) Role for Dpy-30 in ES cell-fate specification by regulation of H3K4 methylation within bivalent domains. Cell 144: 513-525).



Supplementary Figure 9.

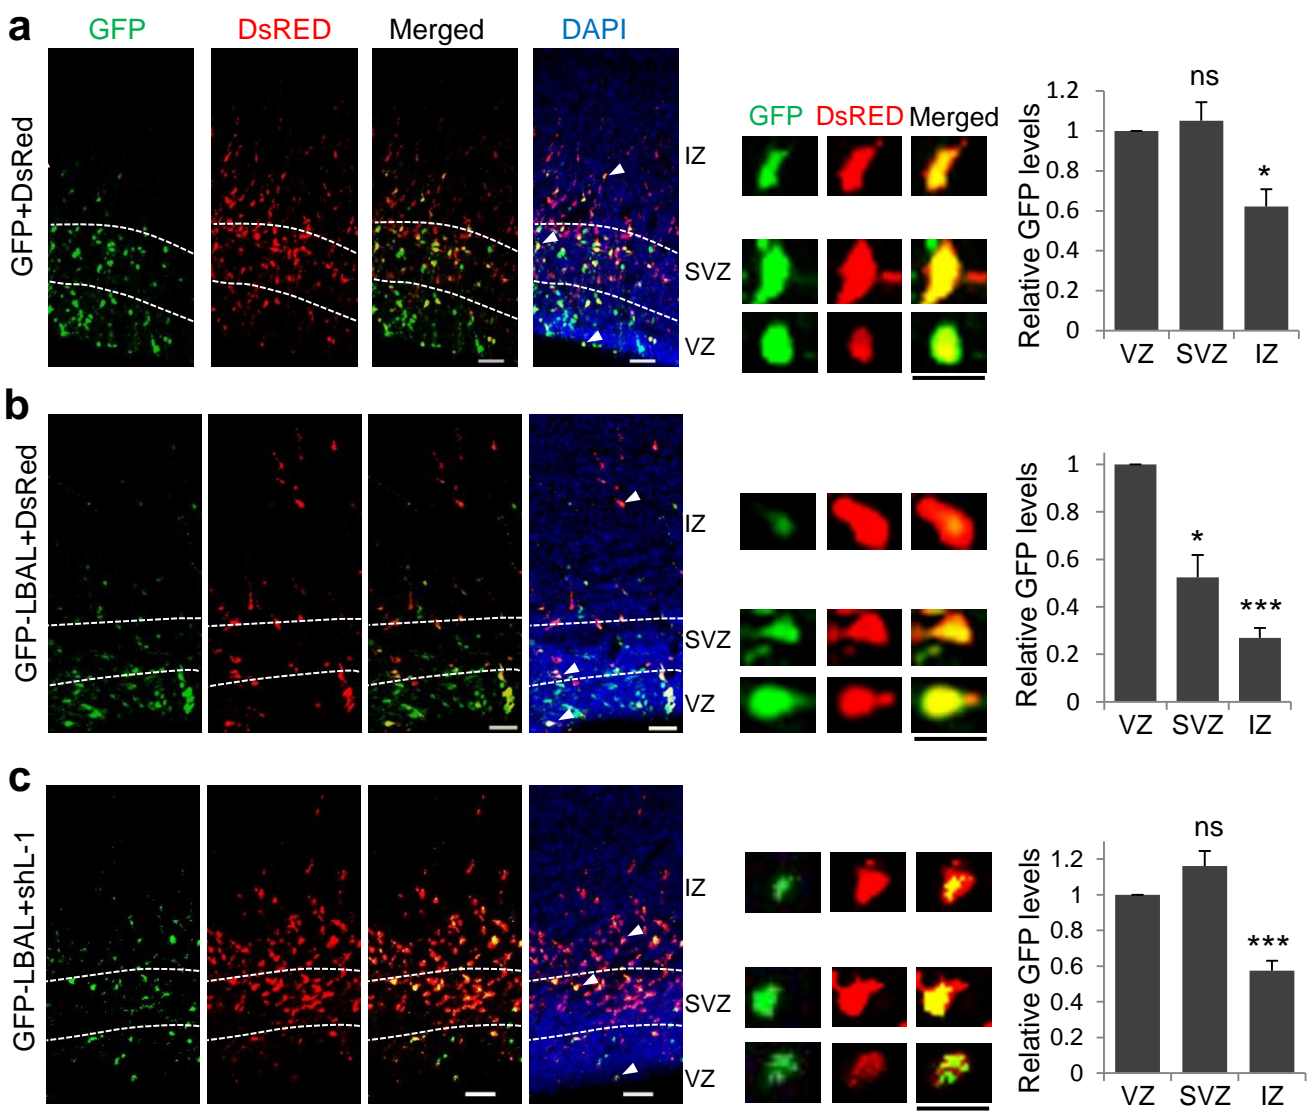

**Supplementary Fig. 9.** related to Fig. 4. **LBAL site plays a role in gene expression in the developing brain.**

**(a-c)** Coronal sections of rat brains electroporated *in utero* with linerated-pCMS-eGFP and DsRED (a), linerated-pCMS-eGFP-LBAL and DsRED (b) or linerated-pCMS-eGFP-LBAL and shL-1 (c) at E16.5 and examined at E19.5. Middle panels: enlarged image of representative cells (indicated by the white arrowhead in the left panel) from different layers (VZ, SVZ, IZ). Right panels: quantification of the intensity of eGFP in cells distributed in different layers (VZ, SVZ and IZ). Data represent means  $\pm$  SEM. \* $P < 0.05$ , \*\*\* $P < 0.001$ ; ns, not significant. (pCMS-eGFP+DsRED:  $n = 6/3$ ; pCMS-eGFP-LBAL+DsRED:  $n = 5/2$ ; pCMS-eGFP-LBAL+shL-1:  $n = 6/3$ ; paired t-test). n: number of brain slices from different brains. Scale bar: 50 $\mu$ m (left panels); 20 $\mu$ m (right panels) .

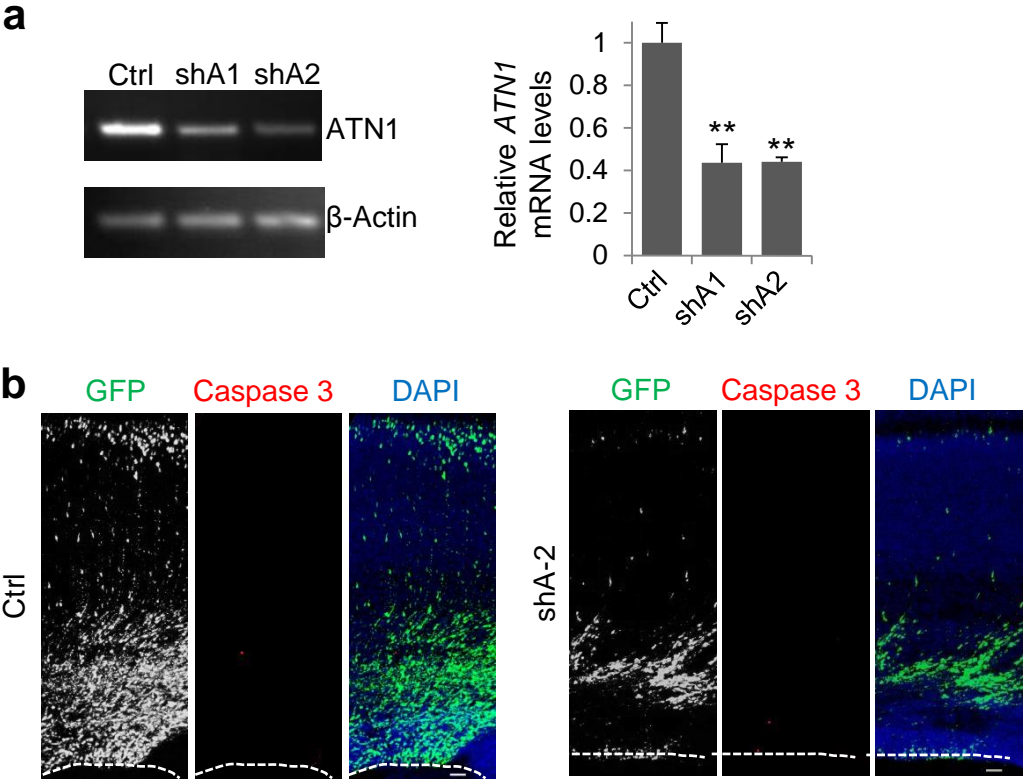

**Supplementary Fig. 10.** related to Fig. 5. **Endogenous ATN1 is efficiently knocked down by ATN1 shRNAs and ATN1 knockdown does not induce obvious apoptosis.**

**(a)** Rat brains were electroporated with Ctrl, shA-1 or shA-2 at E16.5 and GFP+ cells were collected by FACS at E19.5. *ATN1* mRNA levels in these cells were analyzed by qPCR. \*\* $P < 0.01$ , ( $n=3$ ; one-way ANOVA). **(b)** Brain slices (E20.5) electroporated with control or shA-2 at E16.5 were immunostained with activated-caspase3 antibody to label cells undergoing apoptosis. Nuclei were labeled with DAPI. Scale bars, 50 $\mu$ m.

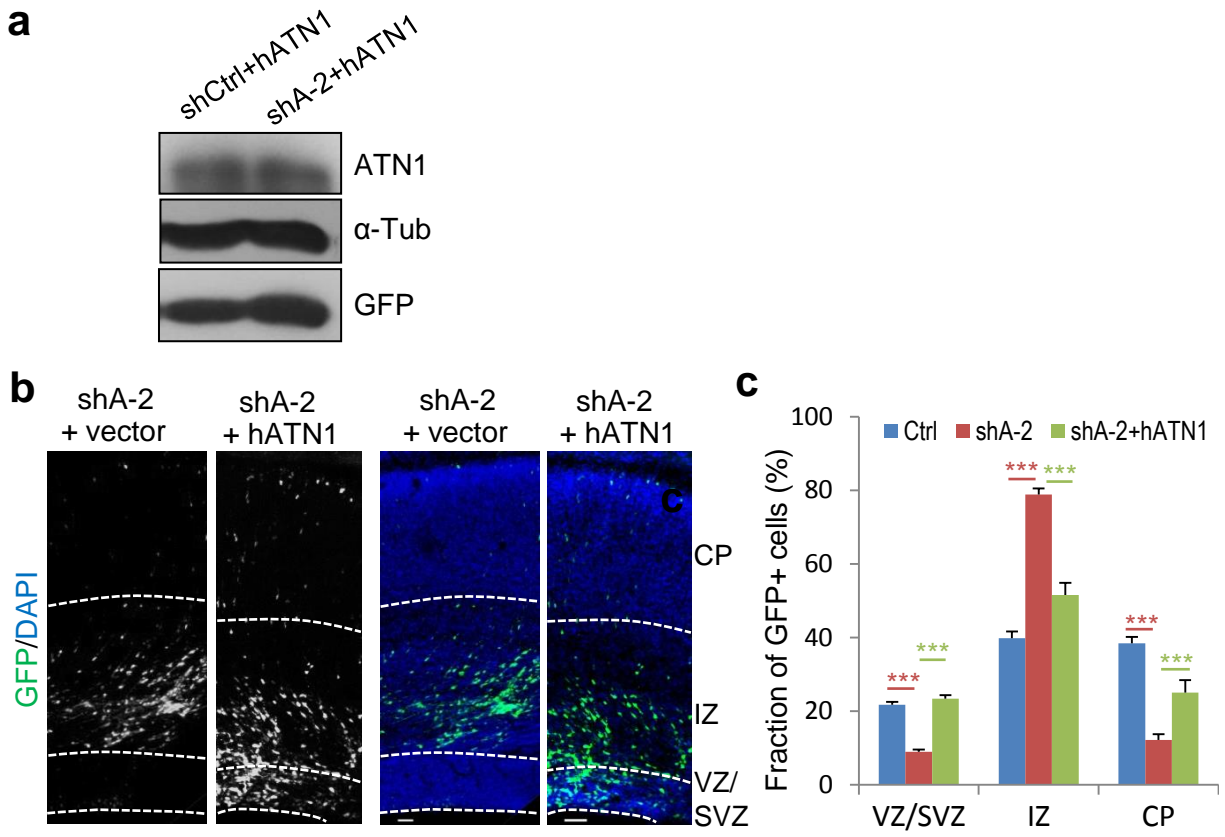

**Supplementary Fig. 11. related to Fig. 5. Overexpression of hATN1 can rescue the ATN1 knockdown induced NPC depletion.**

(a) shA-2 could not knock down human ATN1 (hATN1) expression. hATN1 were transfected into HEK293 cells together with shCtrl or shA-2. 24 hours later, the amount of ATN1 in cell lysates was analyzed by immunoblotting with ATN1 antibody, with α-Tubulin as a loading control and GFP as transfection efficiency control. (b) Coronal sections of rat brains electroporated with shA-2 and empty vector or pCAGIG-hATN1 at E16.5 and inspected at E20.5. (c) Quantification of cell distribution in (b). Data are means ± SEM. \*\*\*: P<0.001. ShCtrl: n=21/7; shA-2: n=27/9; shA-2+hATN1: n=13/4. One-way ANOVA. n: number of brain slices from different brains.. Nuclei were labeled with DAPI. Scale bars, 50µm.

Supplementary Figure 12.

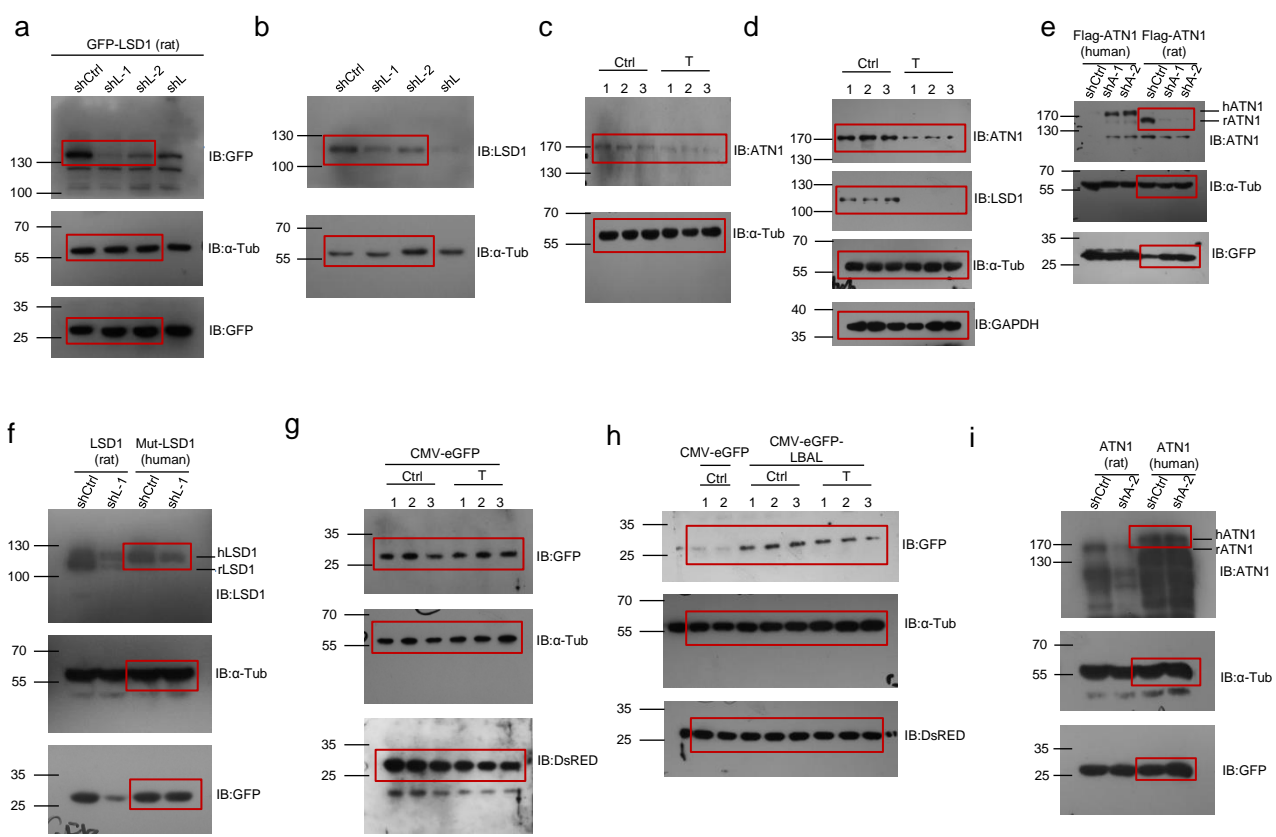

**Supplementary Fig. 12. Original WB images.** (a) Original WB images of Fig.1b. (b) Original WB images of Fig.1c. (c) Original WB images of Fig.3f. (d) Original WB images of Fig.3h. (e) Original WB images of Fig.5c. (f) Original WB images of Supplementary Fig. 2c. (g) Original WB images of Supplementary Fig. 7b. (h) Original WB images of Supplementary Fig. 7c. (i) Original WB images of Supplementary Fig. 11a. Molecular weight markers are represented in kDa. IB: immunoblot.

**Supplementary Table 1. List of LSD1 binding sites highly enriched in LSD1 ChIP-seq. Genome: rn3.**

| Peak Region              | Length | Summit | Tags | $-\log_{10}(P \text{ value})$ | Fold of enrichment | Gene ID, Gene Name                                                   |
|--------------------------|--------|--------|------|-------------------------------|--------------------|----------------------------------------------------------------------|
| chr17:48501822-48502610  | 789    | 465    | 171  | 2463.45                       | 226.14             | NM_001024282, RGD1564767; NM_001107354, Hist1h2an                    |
| chr6:75048900-75049947   | 1048   | 474    | 206  | 2874.68                       | 224.11             | NM_001108711, Snx6                                                   |
| chr10:56592043-56594019  | 1977   | 716    | 285  | 3107.81                       | 220.03             | NM_001127658, Amac1                                                  |
| chr2:191037152-191039701 | 2550   | 1648   | 318  | 2740.6                        | 205.77             | NM_001100836, Fcgr1a; NM_001107698, Hist2h3c2; NM_001123469, Hist2h4 |
| chr6:124480637-124481850 | 1214   | 616    | 150  | 1771.03                       | 162.99             | NM_031969, Calm1                                                     |
| chr16:82780192-82781107  | 916    | 427    | 109  | 1300.52                       | 154.84             | NM_001038591, Ing1; NM_001177684, RGD1311612                         |
| chr4:161114749-161117223 | 2475   | 1043   | 184  | 1326.77                       | 150.76             | NM_017228, <b>Atn1</b> ; NM_053908, Ptpn6; NM_139325, Eno2           |
| chr18:71935925-71936667  | 743    | 316    | 98   | 1215.27                       | 146.69             | NM_001173472, RGD1562987; NM_201415, Rpl17                           |
| chr6:75051151-75053268   | 2118   | 1018   | 212  | 1625.05                       | 145.17             | NM_001108711, Snx6                                                   |
| chr8:93812117-93813307   | 1191   | 630    | 118  | 1253.25                       | 144.65             | NM_001047916, Syncrip                                                |
| chr10:90672259-90674051  | 1793   | 752    | 150  | 1259.29                       | 140.58             | NM_001105842, Rdm1                                                   |

**Supplementary Table 2. The sequence of primers used for cloning or Real-time PCR.**

| <b>Gene or DNA cloned</b> | <b>Primers Sequence for cloning</b>                      |
|---------------------------|----------------------------------------------------------|
| Human ATN1                | 5'-catgtcGAATTCatgaagacacgacagaataaagactcg-3' (F)        |
|                           | 5'-acgtcaCTCGAGGCGGCCGCctacagtggcttgcctttccttc-3' (R)    |
| Rat ATN1                  | 5'-catgtcGAATTCatgaagacacgacagaataaagactcg-3' (F)        |
|                           | 5'-acgtcaCTCGAGGCGGCCGCctacagcggcttgcactctccttc-3' (R)   |
| Human LSD1                | 5'-catgtcGAATTCatgttatctgggaagaaggcggcagccg-3' (F)       |
|                           | 5'-acgtcaGCGGCCGCGGTACctacatgcttggggactgctgtgcagg-3' (R) |
| Rat LSD1                  | 5'-catgtcGAATTCatgttgtctgggaagaaggc-3' (F)               |
|                           | 5'-acgtcaGGTACctacatacttggggactgct-3' (R)                |
| LBAL site                 | 5'-CATGTCTGAATTCGACAAGGCTCTTCTTGGTCTTGAATCTC-3' (F)      |
|                           | 5'-ACGTCACTAGATCAAGAGTCAGAACATTTTAGGCCGGGC-3' (R)        |
| <b>Gene or DNA</b>        | <b>Primers Sequence for Real-time PCR</b>                |
| <i>rat β-actin</i>        | 5'-AGGGAAATCGTGCCTGAC-3' (F)                             |
|                           | 5'-GATAGTGATGACCTGACCGT-3' (R)                           |
| <i>rat ATN1</i>           | 5'-TATAGCCAAGCAGGTCCCAATGGT-3' (F)                       |
|                           | 5'-TGAGCATGAATAGGCGGCTTGAGA-3' (R)                       |
| <i>mouse GAPDH</i>        | 5'-TGATGACATCAAGAAGGTGGTGAAG-3' (F)                      |
|                           | 5'-TCCTTGGAGGCCATGTAGGCCAT-3' (R)                        |
| <i>mouse ATN1</i>         | 5'-TATAACCAAGCAGGTCCCAATGGT-3' (F)                       |
|                           | 5'-TGGGATGAAGAGGGGTGTGAACAT-3' (R)                       |
| rat LBAL                  | 5'-CAGACTAGGCTCCTCACCT-3' (F)                            |
|                           | 5'-GCTTTCGGCCCACTCTAGTT-3' (R)                           |
| mouse LBAL                | 5'-CAGACTAGGCTCTTCTCACCT-3' (F)                          |
|                           | 5'-GGCTTTGATCCTTCTCTGGT-3' (R)                           |
